# Supplementary material for: Thinning leads to calving-style changes at Bowdoin Glacier, Greenland
Source: Copernicus journal article supplement (doi:10.5194/tc-15-485-2021), 2021-02-02
Supplement: Supplementary file 1 [file tc-15-485-2021-supplement.pdf]

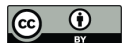

*Supplement of*

## **Thinning leads to calving-style changes at Bowdoin Glacier, Greenland**

**Eef C. H. van Dongen et al.**

*Correspondence to:* Eef C. H. van Dongen ([vandongen@vaw.baug.ethz.ch](mailto:vandongen@vaw.baug.ethz.ch))

The copyright of individual parts of the supplement might differ from the CC BY 4.0 License.

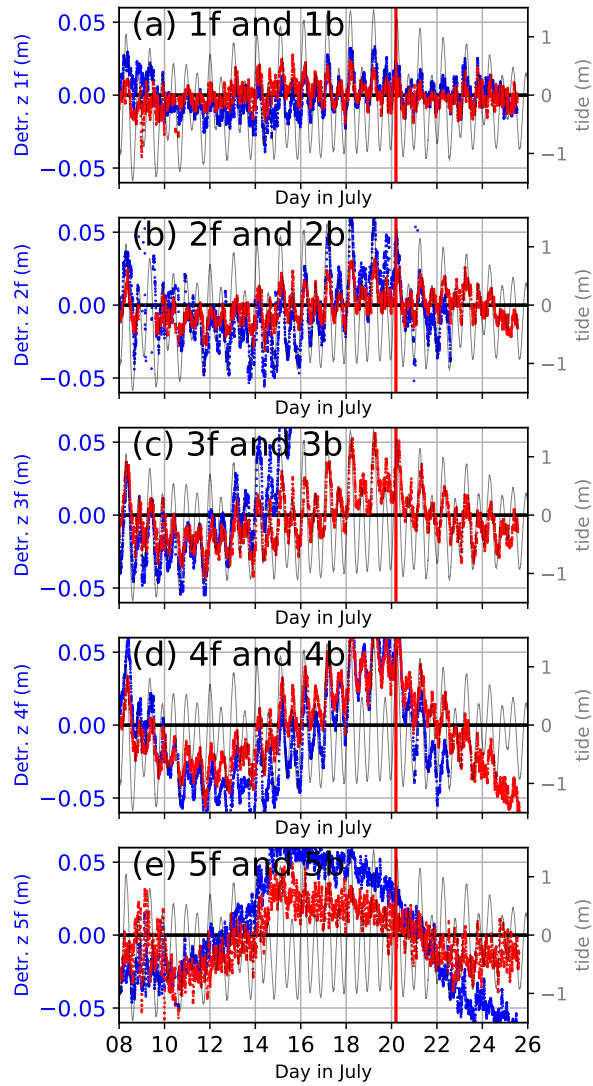

**Figure S1.** Detrended, 1 h moving average vertical position of GPS stations in 2019, with the tidal height in the background. The red vertical line indicates the timing of the large-scale calving event on 20 July.

(a) 2015-05-03 18:30

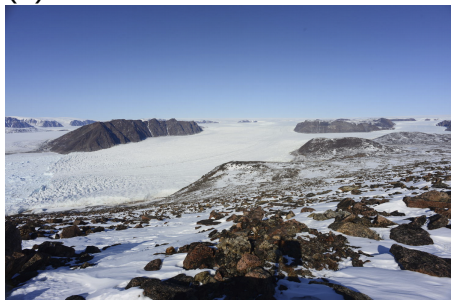

(b) 2015-05-04 18:30

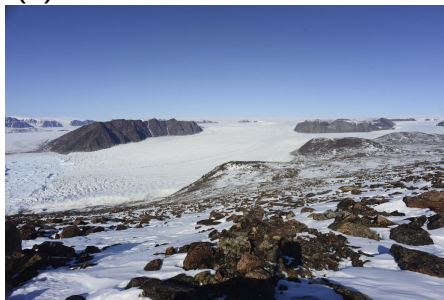

(c) 2015-07-27 20:30

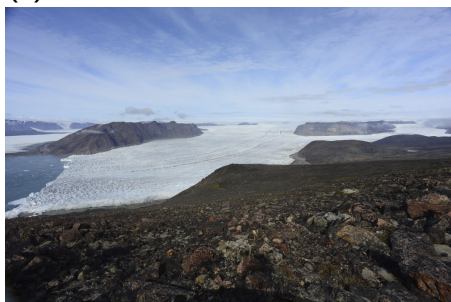

(d) 2015-07-28 20:30

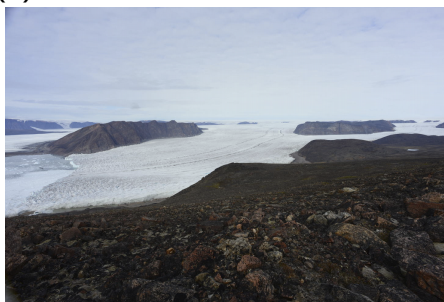

(e) 2016-06-17 21:00

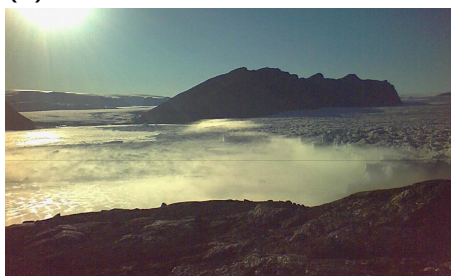

(f) 2016-06-18 00:00

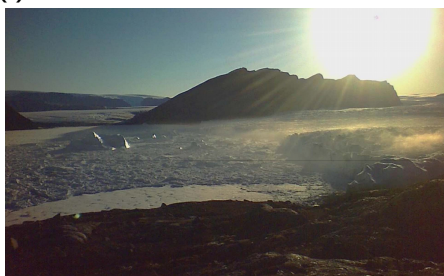

(g) 2017-07-07 21:00

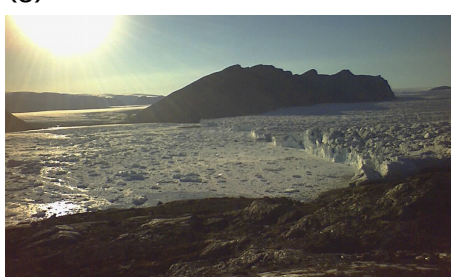

(h) 2017-07-08 00:00

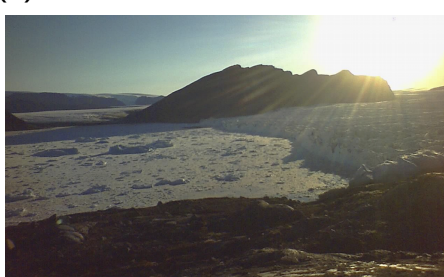

**Figure S2.** Timelapse imagery of major calving events prior to 2019.

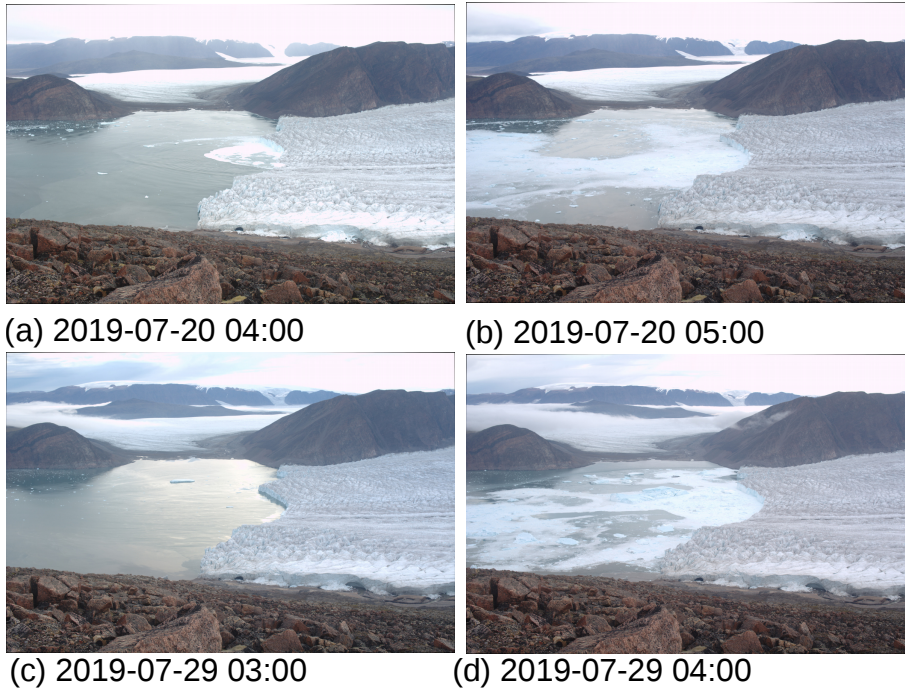

**Figure S3.** Timelapse imagery of major calving events in 2019.
